# Supplementary material
Source: PubMed Central journal article supplement (PMC2955141)
Supplement: 1012016107_pnas.201012016SI.pdf [file 1012016107_pnas.201012016SI.pdf]

# Supporting Information

Kraaij et al. 10.1073/pnas.1012016107

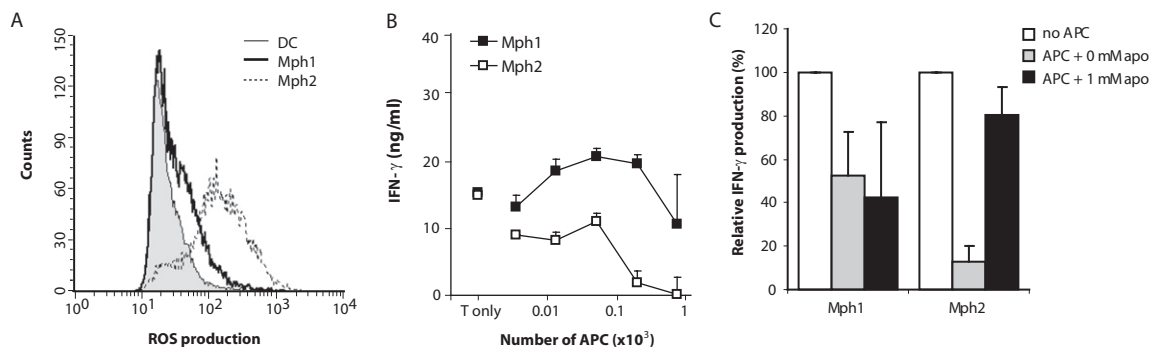

**Fig. S1.** Antiinflammatory macrophages (Mph2) but not proinflammatory macrophages (Mph1) suppress T-cell activation in a reactive oxygen species (ROS)-dependent fashion. (A) Mph1 produce lower levels of ROS than antiinflammatory Mph2 as measured by dihydrorhodamine123 fluorescence by flow cytometry after stimulation with phorbol 12-myristate 13-acetate. DC, dendritic cells. (B) Suppression of anti-CD3/28 Ab induced T-cell IFN- $\gamma$  production by proinflammatory Mph1 is less efficient than suppression by antiinflammatory Mph2. APC, antigen-presenting cells. (C) Apocynin (apo) prevents inhibition of T-cell activation by antiinflammatory Mph2 but not by proinflammatory Mph1.

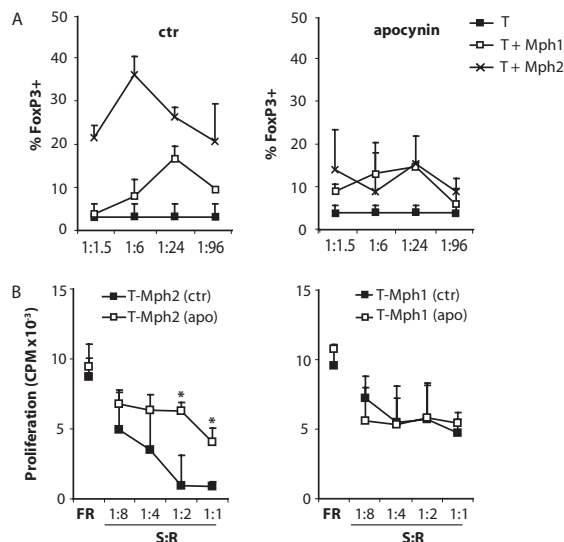

**Fig. S2.** Mph2 but not Mph1 induce regulatory T cells in a ROS-dependent fashion. (A) Priming of CD4<sup>+</sup>CD25<sup>-</sup> T cells with antiinflammatory Mph2 but not with proinflammatory Mph1 induces FoxP3 expression by these T cells. (B) T cells primed with Mph2 but not those primed with Mph1 suppress proliferation of responder T cells in a ROS-dependent fashion. Apocynin (apo) was present during priming to inhibit the Nox2 complex. F, feeder cell; R, responding cell; S, suppressor cell.

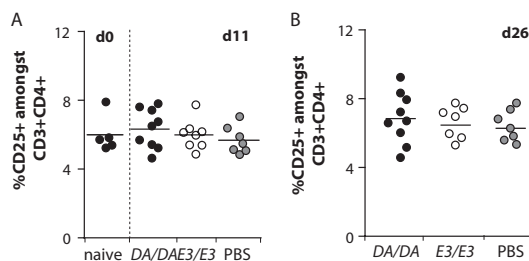

**Fig. S3.** The number of activated T cells during delayed-type hypersensitivity is similar among groups. The percentage of CD25<sup>+</sup> cells among CD3<sup>+</sup>CD4<sup>+</sup> cells 11 d (A) or 26 d (B) after rats were primed with Dark Agouti neutrophil cytosolic factor 1 (DA.Ncf1<sup>DA/DA</sup>) Mph, DA.Ncf1<sup>E3/E3</sup> Mph, or PBS is comparable among groups.
